# Supplementary material
Source: PubMed Central journal article supplement (PMC3957988)
Supplement: IAI.01028-13_zii999090537so1.pdf [file IAI.01028-13_zii999090537so1.pdf]

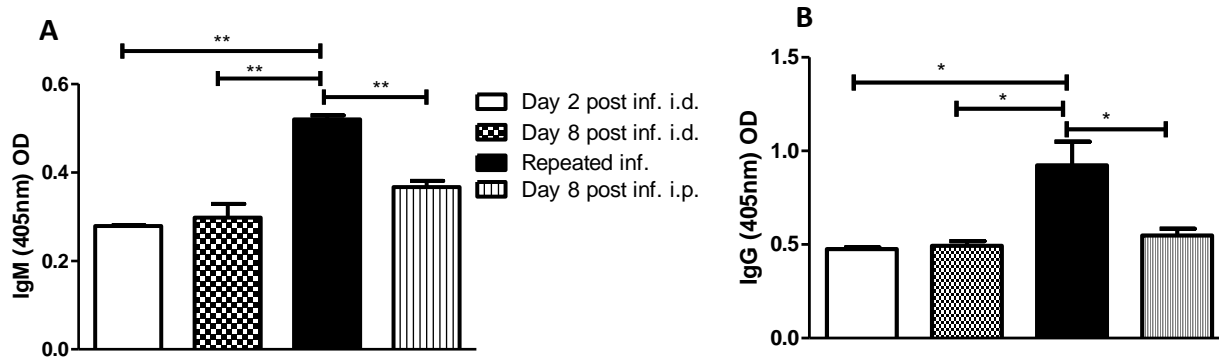

**Supplementary Figure 1. Trypanosome-specific antibody responses in mice infected intradermally with *T. congolense*.**

Groups of BALB/c mice (n = 3-4) were infected intradermally with low dose ( $10^2$ ) *T. congolense* given twice (once weekly for 2 weeks). After 3 weeks, mice were sacrificed and serum levels of parasite-specific IgM (A) and IgG (B) antibodies were determined by ELISA. Mice infected i.d. for 2 and 8 days or i.p for 8 days only were also included. Results are representative of 2 different experiments with similar outcome. \*, p < 0.05, \*\*, p < 0.01; . ns; not significant.
